# Supplementary material
Source: HighWire-hosted journal article supplement (https://bmjopen.bmj.com/content/11/1/e042333)
Supplement: inline-supplementary-material-1 [file inline-supplementary-material-1.pdf]

**Table A1.** Results of univariate analysis of knowledge score

|                                                  | <b>Variables</b> | <b>Mean ± SD</b> | <b>n</b> | <b>p-value</b> |
|--------------------------------------------------|------------------|------------------|----------|----------------|
| Gender                                           |                  |                  |          | < 0.001        |
|                                                  | Male             | 13.88 ± 0.50     | 41       |                |
|                                                  | Female           | 16.27 ± 0.17     | 414      |                |
| Age group (years)                                |                  |                  |          | < 0.001        |
|                                                  | 18-39            | 15.60 ± 0.17     | 397      |                |
|                                                  | 40-59            | 19.19 ± 0.36     | 58       |                |
| Occupation                                       |                  |                  |          | 0.0031         |
|                                                  | Doctor           | 14.93 ± 0.38     | 60       |                |
|                                                  | Nurse            | 16.22 ± 0.18     | 395      |                |
| Type of employment                               |                  |                  |          | < 0.001        |
|                                                  | Contract         | 16.69 ± 0.24     | 238      |                |
|                                                  | Permanent        | 15.36 ± 0.23     | 217      |                |
| Received HAIs education within the previous year |                  |                  |          | 0.0139         |
|                                                  | Yes              | 16.40 ± 0.20     | 274      |                |
|                                                  | No               | 15.54 ± 0.29     | 181      |                |
| Occupational exposures within 6 months           |                  |                  |          | 0.0072         |
|                                                  | Yes              | 16.41 ± 0.21     | 282      |                |
|                                                  | No               | 15.48 ± 0.27     | 173      |                |
| Received invasive operation authority            |                  |                  |          | < 0.001        |
|                                                  | Yes              | 16.38 ± 0.19     | 326      |                |
|                                                  | No               | 15.22 ± 0.31     | 129      |                |
| Received antibacterial drug training             |                  |                  |          | 0.0254         |
|                                                  | Yes              | 16.38 ± 0.23     | 257      |                |
|                                                  | No               | 15.64 ± 0.24     | 198      |                |

**Table A1.** (continued)

|                                                       | <b>Variables</b>    | <b>Mean ± SD</b> | <b>n</b> | <b>p-value</b> |
|-------------------------------------------------------|---------------------|------------------|----------|----------------|
| Department                                            |                     |                  |          | 0.040          |
|                                                       | Internal medicine   | 14.69 ± 4.51     | 16       |                |
|                                                       | Surgery             | 15.77 ± 3.44     | 83       |                |
|                                                       | Obstetrics          | 15.35 ± 2.23     | 20       |                |
|                                                       | Intensive care unit | 15.54 ± 3.00     | 87       |                |
|                                                       | Emergency           | 14.43 ± 4.40     | 21       |                |
|                                                       | Outpatient          | 13.45 ± 3.45     | 11       |                |
|                                                       | Operating room      | 16.23 ± 3.27     | 128      |                |
|                                                       | Infectious diseases | 16.07 ± 3.30     | 68       |                |
|                                                       | Other               | 14.67 ± 2.52     | 21       |                |
| Clinical work experience (years)                      |                     |                  |          | 0.025          |
|                                                       | 1-5                 | 15.43 ± 3.40     | 203      |                |
|                                                       | 6-10                | 15.15 ± 3.38     | 110      |                |
|                                                       | 11-15               | 16.35 ± 2.98     | 40       |                |
|                                                       | 16-20               | 16.48 ± 3.13     | 42       |                |
|                                                       | ≥21                 | 16.45 ± 3.17     | 60       |                |
| Attended consultation of nosocomial infection disease |                     |                  |          | < 0.001        |
|                                                       | Yes                 | 16.60 ± 0.22     | 238      |                |
|                                                       | No                  | 15.47 ± 0.25     | 217      |                |

**Table A2.** Results of univariate analysis of attitude score

|                                                  | <b>Variables</b>         | <b>Mean ± SD</b> | <b>n</b> | <b>p-value</b> |
|--------------------------------------------------|--------------------------|------------------|----------|----------------|
| Age group (years)                                | 18-39                    | 24.83 ± 0.14     | 397      | < 0.001        |
|                                                  | 40-59                    | 26.19 ± 0.36     | 58       |                |
| Type of employment                               | Contract                 | 25.29 ± 0.16     | 238      | 0.0168         |
|                                                  | Permanent                | 24.67 ± 0.20     | 217      |                |
| Received HAIs education within the previous year | Yes                      | 25.41 ± 0.15     | 274      | < 0.001        |
|                                                  | No                       | 24.38 ± 0.22     | 181      |                |
| Occupational exposure within 6 months            | Yes                      | 25.35 ± 0.15     | 282      | < 0.001        |
|                                                  | No                       | 24.42 ± 0.22     | 173      |                |
| Received invasive operation authority            | Yes                      | 25.37 ± 0.15     | 326      | < 0.001        |
|                                                  | No                       | 24.05 ± 0.25     | 129      |                |
| Received antibacterial drug training             | Yes                      | 25.34 ± 0.17     | 257      | 0.0023         |
|                                                  | No                       | 24.55 ± 0.20     | 198      |                |
| Educational level                                | Junior college           | 24.30 ± 2.64     | 37       | 0.012          |
|                                                  | Bachelor's degree        | 24.86 ± 2.74     | 310      |                |
|                                                  | Master's degree or above | 25.63 ± 2.73     | 108      |                |

**Table A2.** (continued)

|                                                       | <b>Variables</b>    | <b>Mean ± SD</b> | <b>n</b> | <b>p-value</b> |
|-------------------------------------------------------|---------------------|------------------|----------|----------------|
| Attended consultation of nosocomial infection disease |                     |                  |          | 0.0089         |
|                                                       | Yes                 | 25.32 ± 0.18     | 238      |                |
|                                                       | No                  | 24.65 ± 0.19     | 217      |                |
| Department                                            |                     |                  |          | < 0.001        |
|                                                       | Internal medicine   | 24.19 ± 2.93     | 16       |                |
|                                                       | Surgery             | 25.20 ± 3.02     | 83       |                |
|                                                       | Obstetrics          | 24.00 ± 2.97     | 20       |                |
|                                                       | Intensive care unit | 25.54 ± 2.40     | 87       |                |
|                                                       | Emergency           | 23.19 ± 3.11     | 21       |                |
|                                                       | Outpatient          | 22.18 ± 3.37     | 11       |                |
|                                                       | Operating room      | 25.29 ± 2.46     | 128      |                |
|                                                       | Infectious diseases | 25.54 ± 2.42     | 68       |                |
|                                                       | Other               | 23.24 ± 2.45     | 21       |                |
| Clinical work experience (years)                      |                     |                  |          | < 0.001        |
|                                                       | 1-5                 | 24.56 ± 2.76     | 203      |                |
|                                                       | 6-10                | 24.77 ± 2.64     | 110      |                |
|                                                       | 11-15               | 25.38 ± 2.39     | 40       |                |
|                                                       | 16-20               | 26.31 ± 2.70     | 42       |                |
|                                                       | ≥21                 | 25.73 ± 2.79     | 60       |                |
| Marital status                                        |                     |                  |          | 0.002          |
|                                                       | Unmarried           | 24.20 ± 2.82     | 99       |                |
|                                                       | Married             | 25.25 ± 2.72     | 344      |                |
|                                                       | Widowed / divorced  | 24.33 ± 1.56     | 12       |                |

**Table A2.** (continued)

|                    | <b>Variables</b> | <b>Mean ± SD</b> | <b>n</b> | <b>p-value</b> |
|--------------------|------------------|------------------|----------|----------------|
| Professional title |                  |                  |          | < 0.001        |
|                    | Senior           | 26.39 ± 2.13     | 23       |                |
|                    | Middle           | 25.53 ± 2.87     | 130      |                |
|                    | Primary          | 24.66 ± 2.68     | 302      |                |

**Table A3.** Results of univariate analysis of practice score

|                                                  | <b>Variables</b>         | <b>Mean ± SD</b> | <b>n</b> | <b>p-value</b> |
|--------------------------------------------------|--------------------------|------------------|----------|----------------|
| Gender                                           | Male                     | 41.41 ± 0.86     | 41       | 0.0169         |
|                                                  | Female                   | 43.64 ± 0.25     | 414      |                |
| Age group (years)                                | 18-39                    | 43.14 ± 0.26     | 397      | < 0.001        |
|                                                  | 40-59                    | 45.50 ± 0.51     | 58       |                |
| Type of hospital                                 | The children's hospital  | 42.61 ± 0.41     | 136      | 0.0207         |
|                                                  | General hospital         | 43.79 ± 0.30     | 319      |                |
| Position                                         | Staff                    | 42.61 ± 0.41     | 136      | 0.0207         |
|                                                  | Head                     | 43.79 ± 0.29     | 319      |                |
| Type of employment                               | Contract                 | 44.50 ± 0.33     | 238      | < 0.001        |
|                                                  | Permanent                | 42.28 ± 0.34     | 217      |                |
| Educational level                                | Junior college           | 38.24 ± 4.17     | 37       | < 0.001        |
|                                                  | Bachelor's degree        | 43.85 ± 4.97     | 310      |                |
|                                                  | Master's degree or above | 44.03 ± 5.04     | 108      |                |
| Received HAIs education within the previous year | Yes                      | 44.81 ± 0.29     | 274      | < 0.001        |
|                                                  | No                       | 41.36 ± 0.37     | 181      |                |

**Table A3.** (continued)

|                                       | <b>Variables</b>                                      | <b>Mean ± SD</b> | <b>n</b>     | <b>p-value</b> |
|---------------------------------------|-------------------------------------------------------|------------------|--------------|----------------|
| Occupational exposure within 6 months | Yes                                                   | 45.34 ± 0.26     | 284          | < 0.001        |
|                                       | No                                                    | 40.28 ± 0.36     | 171          |                |
| Received invasive operation authority | Yes                                                   | 44.81 ± 0.26     | 326          | < 0.001        |
|                                       | No                                                    | 39.98 ± 0.40     | 129          |                |
| Received antibacterial drug training  | Yes                                                   | 45.35 ± 0.27     | 257          | < 0.001        |
|                                       | No                                                    | 40.96 ± 0.36     | 198          |                |
| Department                            | Internal medicine                                     | 38.13 ± 4.84     | 16           | < 0.001        |
|                                       | Surgery                                               | 44.51 ± 4.76     | 83           |                |
|                                       | Obstetrics                                            | 38.60 ± 4.27     | 20           |                |
|                                       | Intensive care unit                                   | 43.95 ± 5.19     | 87           |                |
|                                       | Emergency                                             | 39.71 ± 3.66     | 21           |                |
|                                       | Outpatient                                            | 39.36 ± 4.32     | 11           |                |
|                                       | Operating room                                        | 44.98 ± 4.91     | 128          |                |
|                                       | Infectious diseases                                   | 44.46 ± 3.80     | 68           |                |
|                                       | Other                                                 | 38.95 ± 4.40     | 21           |                |
|                                       | Attended consultation of nosocomial infection disease | Yes              | 44.61 ± 0.30 |                |
| No                                    |                                                       | 42.16 ± 0.37     | 217          |                |

**Table A3.** (continued)

|                                  | <b>Variables</b>   | <b>Mean ± SD</b> | <b>n</b> | <b>p-value</b> |
|----------------------------------|--------------------|------------------|----------|----------------|
| Clinical work experience (years) | 1-5                | 42.89 ± 5.57     | 203      | 0.012          |
|                                  | 6-10               | 42.88 ± 5.33     | 110      |                |
|                                  | 11-15              | 45.20 ± 3.34     | 40       |                |
|                                  | 16-20              | 44.00 ± 4.54     | 42       |                |
|                                  | ≥21                | 44.77 ± 4.24     | 60       |                |
|                                  | Professional Title |                  |          |                |
|                                  | Senior             | 46.17 ± 4.03     | 23       |                |
|                                  | Middle             | 43.63 ± 4.78     | 130      |                |
|                                  | Primary            | 43.15 ± 5.33     | 302      |                |



**Table A4.** Results of univariate analysis of the total KAP score

|                                                  | <b>Variables</b>        | <b>Mean ± SD</b> | <b>n</b> | <b>p-value</b> |
|--------------------------------------------------|-------------------------|------------------|----------|----------------|
| Gender                                           | Male                    | 80.41 ± 1.27     | 41       | 0.0014         |
|                                                  | Female                  | 84.90 ± 0.36     | 414      |                |
| Age group (years)                                | 18-39                   | 83.56 ± 0.37     | 397      | < 0.001        |
|                                                  | 40-59                   | 90.88 ± 0.63     | 58       |                |
| Occupation                                       | Doctor                  | 82.40 ± 0.98     | 60       | 0.0244         |
|                                                  | Nurse                   | 84.81 ± 0.37     | 395      |                |
| Type of hospital                                 | The children's hospital | 83.22 ± 0.63     | 136      | 0.0169         |
|                                                  | General hospital        | 85.03 ± 0.41     | 319      |                |
| Position                                         | Staff                   | 84.06 ± 0.34     | 437      | < 0.001        |
|                                                  | Head                    | 95.06 ± 1.10     | 18       |                |
| Type of employment                               | Contract                | 86.48 ± 0.46     | 238      | < 0.001        |
|                                                  | Permanent               | 82.31 ± 0.48     | 217      |                |
| Received HAIs education within the previous year | Yes                     | 86.62 ± 0.39     | 274      | < 0.001        |
|                                                  | No                      | 81.28 ± 0.56     | 181      |                |
| Occupational exposure within 6 months            | Yes                     | 87.12 ± 0.39     | 284      | < 0.001        |
|                                                  | No                      | 80.13 ± 0.52     | 171      |                |

**Table A4.** (continued)

|                                                       | <b>Variables</b> | <b>Mean ± SD</b> | <b>n</b> | <b>p-value</b> |
|-------------------------------------------------------|------------------|------------------|----------|----------------|
| Received invasive operation authority                 | Yes              | 86.56 ± 0.38     | 326      | < 0.001        |
|                                                       | No               | 79.26 ± 0.54     | 129      |                |
| Received antibacterial drug training                  | Yes              | 87.07 ± 0.42     | 257      | < 0.001        |
|                                                       | No               | 81.15 ± 0.50     | 198      |                |
| Attended consultation of nosocomial infection disease | Yes              | 86.52 ± 0.42     | 238      | < 0.001        |
|                                                       | No               | 82.27 ± 0.52     | 217      |                |
